# Supplementary material for: RNAseq analysis of treatment-dependent signaling changes during inflammation in a mouse cutaneous wound healing model
Source: PubMed Central journal article supplement (PMC8614049; doi:10.1186/s12864-021-08083-2), 2021-11-25
Supplement: 12864_2021_8083_MOESM1_ESM.pdf [file 12864_2021_8083_MOESM1_ESM.pdf]

# Supplementary Figures

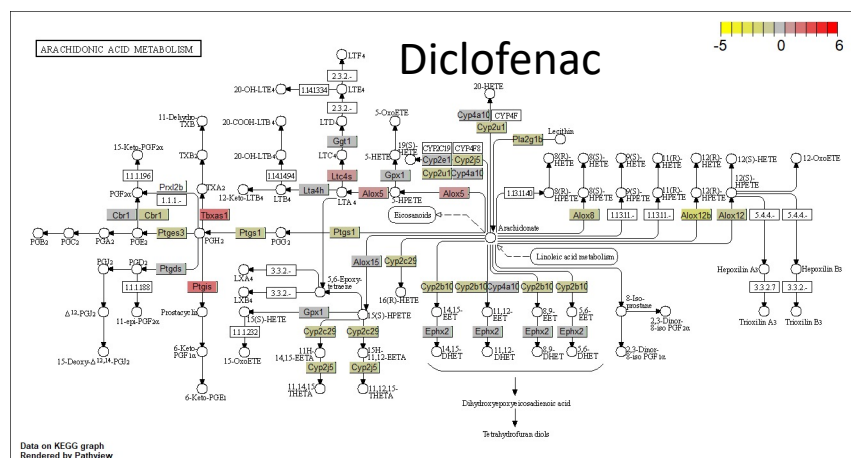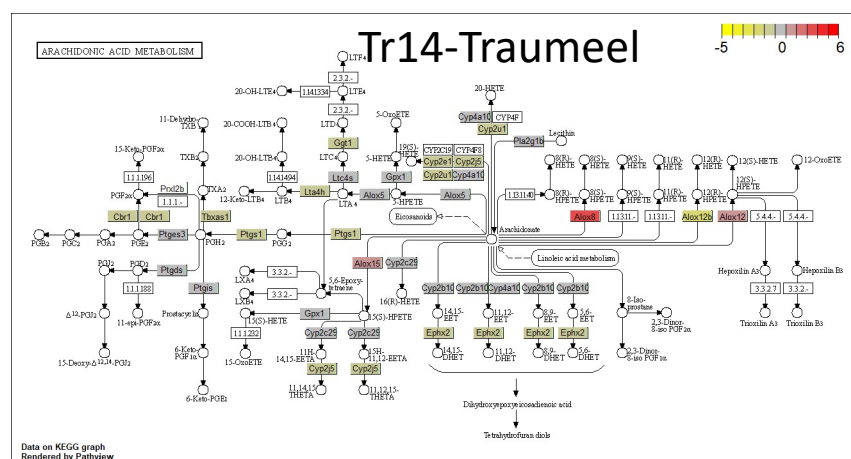

| Gene      | Transcript                              | 12 HOUR     |            |
|-----------|-----------------------------------------|-------------|------------|
|           |                                         | Fold Change |            |
| Symbol    | Description                             | Tr14        | Diclofenac |
| Alox12    | arachidonate 12-lipoxygenase            | 2.82        | -1.54      |
| Alox12b   | arachidonate 12-lipoxygenase, 12B       | -3.51       | -3.15      |
| Alox15    | arachidonate 15-lipoxygenase            | -1.43       | 3.93       |
| Alox5     | arachidonate 5-lipoxygenase             | 1.36        | 2.35       |
| Alox8     | arachidonate 8-lipoxygenase             | 11.73       | -1.67      |
| Cyp4f18   | cytochrome P450, family 4f18            | -1.12       | -2.22      |
| Pla2g12b  | phospholipase A2, group XIIB            | 0.00        | 0.00       |
| Pla2g1b   | phospholipase A2, group IB, pancreas    | 2.27        | 0.00       |
| Pla2g4d   | phospholipase A2, group IVD             | 1.84        | 1.61       |
| Ptg1/COX1 | prostaglandin synthase 1 (constitutive) | -1.47       | 1.15       |
| Ptg2/COX2 | prostaglandin synthase 2 (inducible)    | -1.26       | -1.90      |
| Tbx1      | Thromboxane A Synthase 1                | -1.00       | 5.72       |

**Supplemental Figure 1.** Arachadonic Acid/prostaglandin/leukotriene pathway analysis of treatment-induced signaling changes at the 12H timepoint.

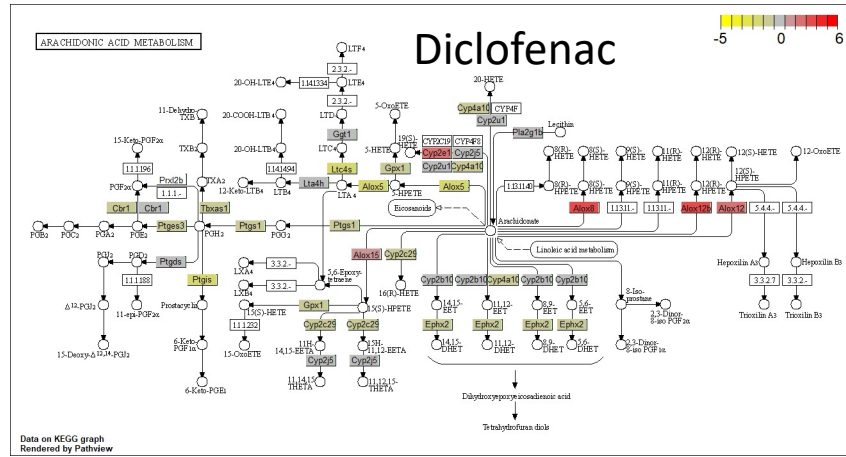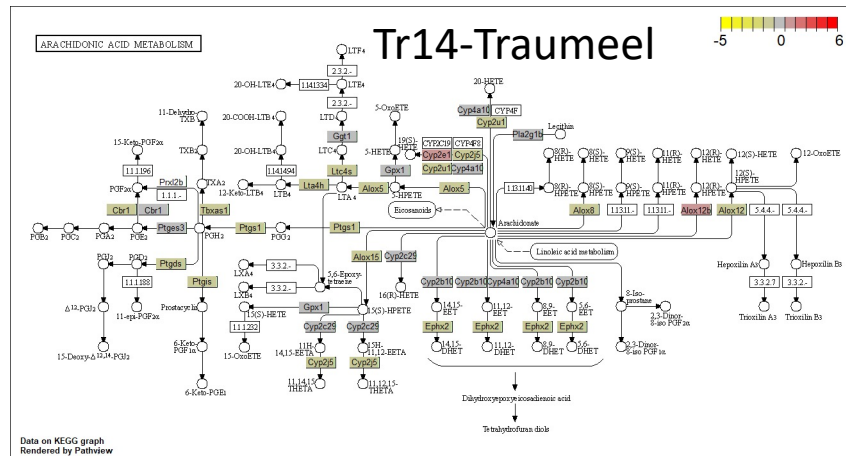

| Gene Symbol | Transcript Description                  | 36 HOUR Fold Change |            |
|-------------|-----------------------------------------|---------------------|------------|
|             |                                         | Tr14                | Diclofenac |
| Alox12      | arachidonate 12-lipoxygenase            | -1.29               | 3.40       |
| Alox12b     | arachidonate 12-lipoxygenase, 12B       | 2.06                | 10.99      |
| Alox15      | arachidonate 15-lipoxygenase            | -1.04               | -1.56      |
| Alox5       | arachidonate 5-lipoxygenase             | -1.13               | -2.30      |
| Alox8       | arachidonate 8-lipoxygenase             | -1.93               | 8.71       |
| Cyp4f18     | cytochrome P450, family 4f18            | -1.89               | -1.57      |
| Pla2g12b    | phospholipase A2, group XIIB            | 1.18                | -2.20      |
| Pla2g1b     | phospholipase A2, group IB, pancreas    | 0.00                | -1.61      |
| Pla2g4d     | phospholipase A2, group IVD             | 2.46                | 5.58       |
| Ptgs1/COX1  | prostaglandin synthase 1 (constitutive) | 1.08                | -1.36      |
| Ptgs2/COX2  | prostaglandin synthase 2 (inducible)    | -1.35               | 1.13       |
| Tbxas1      | Thromboxane A Synthase 1                | -1.45               | -1.28      |

**Supplemental Figure 2.** Arachadonic Acid/prostaglandin/leukotriene pathway analysis of treatment-induced signaling changes at the 36 H timepoint.

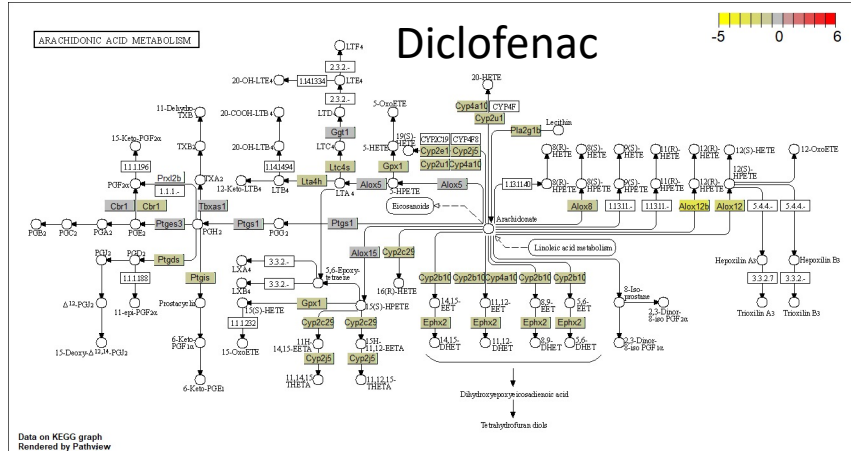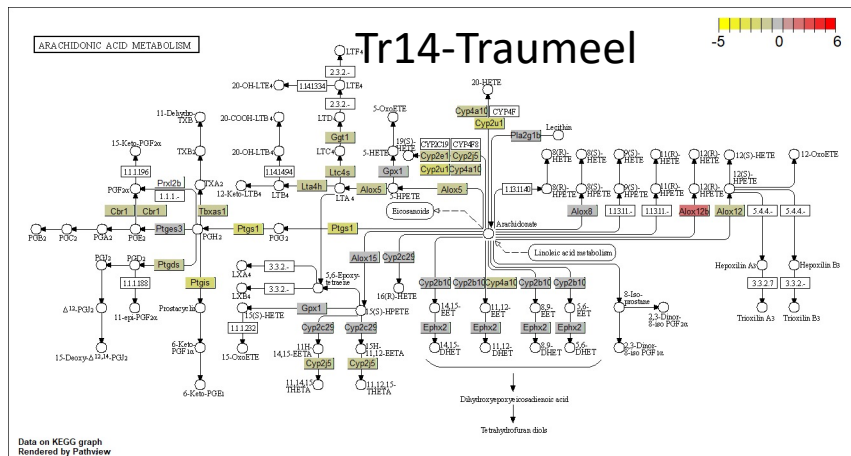

| Gene Symbol | Transcript Description                  | 72 HOUR Fold Change |            |
|-------------|-----------------------------------------|---------------------|------------|
|             |                                         | Tr14                | Diclofenac |
| Alox12      | arachidonate 12-lipoxygenase            | -1.59               | -1.11      |
| Alox12b     | arachidonate 12-lipoxygenase, 12B       | 4.93                | -4.73      |
| Alox15      | arachidonate 15-lipoxygenase            | -1.24               | 1.37       |
| Alox5       | arachidonate 5-lipoxygenase             | -1.08               | 1.47       |
| Alox8       | arachidonate 8-lipoxygenase             | 1.35                | -1.23      |
| Cyp4f18     | cytochrome P450, family 4f18            | -4.19               | 1.58       |
| Pla2g12b    | phospholipase A2, group XIIB            | -2.71               | -2.59      |
| Pla2g1b     | phospholipase A2, group IB, pancreas    | -1.92               | 3.91       |
| Pla2g4d     | phospholipase A2, group IVD             | 1.79                | -1.81      |
| Ptgs1/COX1  | prostaglandin synthase 1 (constitutive) | -1.19               | -1.16      |
| Ptgs2/COX2  | prostaglandin synthase 2 (inducible)    | -6.99               | 2.19       |
| Tbxas1      | Thromboxane A Synthase 1                | -1.44               | 1.23       |

**Supplemental Figure 3.** Arachadonic Acid/prostaglandin/leukotriene pathway analysis of treatment-induced signaling changes at the 72H timepoint.

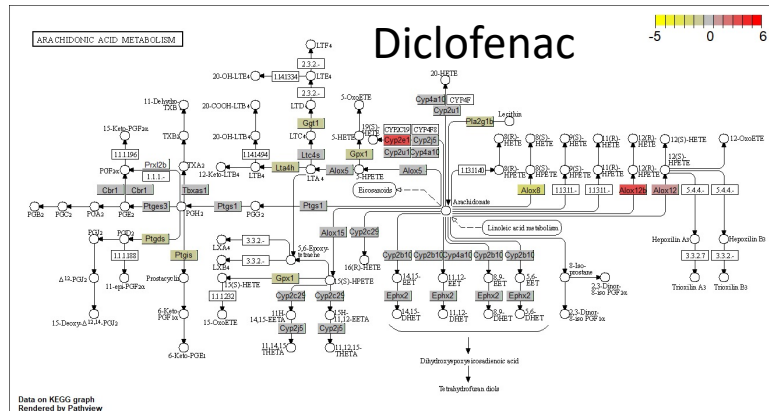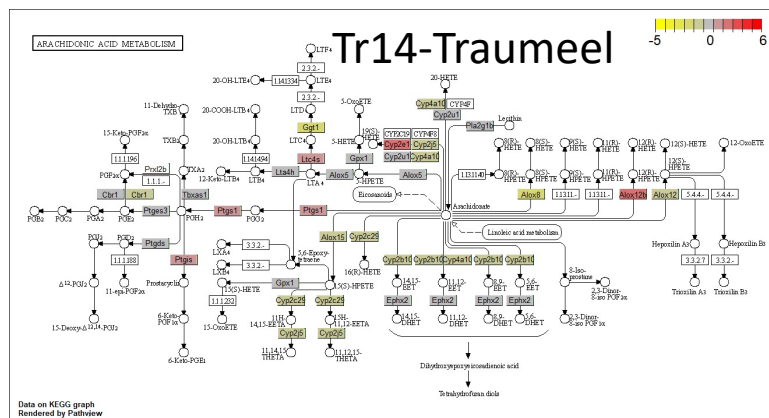

| Gene       | Transcript                              | 96 HOUR     |            |
|------------|-----------------------------------------|-------------|------------|
|            |                                         | Fold Change |            |
| Symbol     | Description                             | Tr14        | Diclofenac |
| Alox12     | arachidonate 12-lipoxygenase            | 1.02        | 2.05       |
| Alox12b    | arachidonate 12-lipoxygenase, 12B       | 4.72        | 8.38       |
| Alox15     | arachidonate 15-lipoxygenase            | 1.44        | 3.18       |
| Alox5      | arachidonate 5-lipoxygenase             | 1.27        | 1.24       |
| Alox8      | arachidonate 8-lipoxygenase             | -2.59       | -2.54      |
| Cyp4f18    | cytochrome P450, family 4f18            | 2.03        | 2.34       |
| Pla2g12b   | phospholipase A2, group XIIB            | 3.22        | -1.88      |
| Pla2g1b    | phospholipase A2, group IB, pancreas    | 3.08        | -2.75      |
| Pla2g4d    | phospholipase A2, group IVD             | 3.52        | 3.05       |
| Ptgs1/COX1 | prostaglandin synthase 1 (constitutive) | 1.65        | 1.50       |
| Ptgs2/COX2 | prostaglandin synthase 2 (inducible)    | 3.34        | 1.36       |
| Tbxas1     | Thromboxane A Synthase 1                | 1.93        | 1.23       |

**Supplemental Figure 4.** Arachadonic Acid/prostaglandin/leukotriene pathway analysis of treatment-induced signaling changes at the 96 H timepoint.

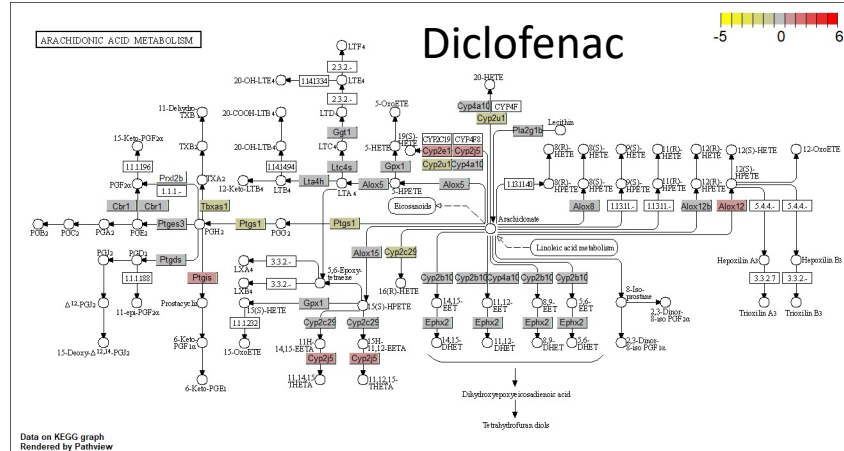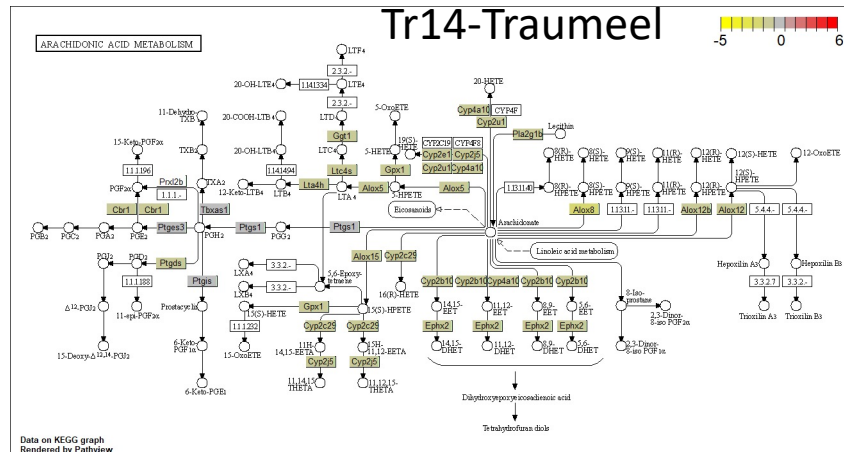

| Gene<br>Symbol | Transcript<br>Description               | 120 HOUR<br>Fold Change |            |
|----------------|-----------------------------------------|-------------------------|------------|
|                |                                         | Tr14                    | Diclofenac |
| Alox12         | arachidonate 12-lipoxygenase            | -2.06                   | 1.01       |
| Alox12b        | arachidonate 12-lipoxygenase, 12B       | -1.18                   | 1.51       |
| Alox15         | arachidonate 15-lipoxygenase            | -1.09                   | 1.79       |
| Alox5          | arachidonate 5-lipoxygenase             | -1.56                   | 1.26       |
| Alox8          | arachidonate 8-lipoxygenase             | -2.75                   | 1.59       |
| Cyp4f18        | cytochrome P450, family 4f18            | 1.88                    | -1.93      |
| Pla2g12b       | phospholipase A2, group XIIB            | 0.00                    | 0.00       |
| Pla2g1b        | phospholipase A2, group IB, pancreas    | -1.23                   | 1.88       |
| Pla2g4d        | phospholipase A2, group IVD             | -1.51                   | 1.11       |
| Ptgs1/COX1     | prostaglandin synthase 1 (constitutive) | -1.08                   | 1.72       |
| Ptgs2/COX2     | prostaglandin synthase 2 (inducible)    | 2.87                    | -2.50      |
| Tbxas1         | Thromboxane A Synthase 1                | 1.51                    | -1.36      |

**Supplemental Figure 5.** Arachadonic Acid/prostaglandin/leukotriene pathway analysis of treatment-induced signaling changes at the 120 H timepoint.

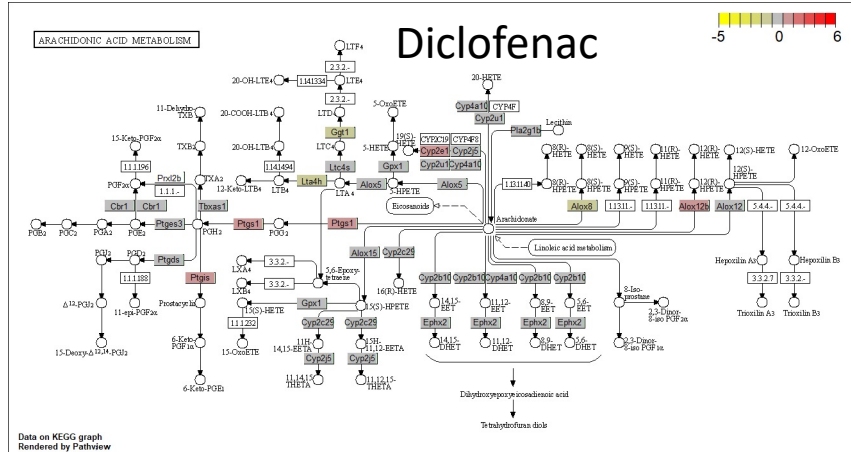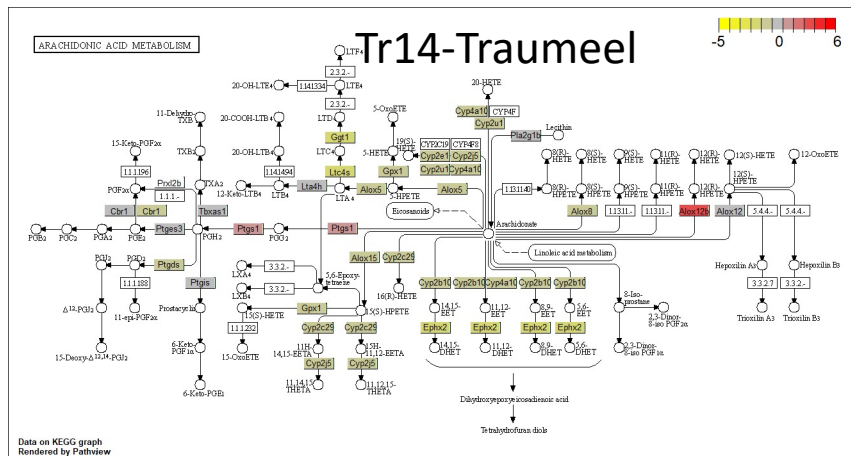

| Gene Symbol | Transcript Description                  | 192 HOUR Fold Change |            |
|-------------|-----------------------------------------|----------------------|------------|
|             |                                         | Tr14                 | Diclofenac |
| Alox12      | arachidonate 12-lipoxygenase            | 1.80                 | 1.51       |
| Alox12b     | arachidonate 12-lipoxygenase, 12B       | 13.37                | 2.27       |
| Alox15      | arachidonate 15-lipoxygenase            | -1.03                | 2.24       |
| Alox5       | arachidonate 5-lipoxygenase             | -1.80                | 1.23       |
| Alox8       | arachidonate 8-lipoxygenase             | -1.09                | -1.95      |
| Cyp4f18     | cytochrome P450, family 4f18            | 1.31                 | 2.03       |
| Pla2g12b    | phospholipase A2, group XIIB            | 0.00                 | 1.99       |
| Pla2g1b     | phospholipase A2, group IB, pancreas    | -1.04                | -1.71      |
| Pla2g4d     | phospholipase A2, group IVD             | 13.58                | 5.32       |
| Ptgs1/COX1  | prostaglandin synthase 1 (constitutive) | 1.52                 | 1.95       |
| Ptgs2/COX2  | prostaglandin synthase 2 (inducible)    | 2.76                 | 3.21       |
| Tbxas1      | Thromboxane A Synthase 1                | 1.06                 | 1.04       |

**Supplemental Figure 6.** Arachadonic Acid/prostaglandin/leukotriene pathway analysis of treatment-induced signaling changes at the 192 H timepoint.
